# Supplementary material
Source: MDPI journal article supplement (https://www.mdpi.com/search?q=forests-11-01236)
Supplement: s001 [file forests-11-01236-s001.pdf]

**Supplementary**

**Table S1.** Tree species composition ( $\geq 10$  cm circumference at breast height; 1.3 m) in a natural forest and developing stands following shifting agriculture in Mizoram, Northeast India. IVI = Importance value index.

| <b>3-yr old</b>                                                        |                  |            |
|------------------------------------------------------------------------|------------------|------------|
| <b>Species</b>                                                         | <b>Family</b>    | <b>IVI</b> |
| <i>Mangifera indica</i> L.                                             | Anacardiaceae    | 91.67      |
| <i>Parkia timoriana</i> (DC.) Merr.                                    | Leguminosae      | 75.00      |
| <i>Psidium guajava</i> L.                                              | Myrtaceae        | 75.00      |
| <i>Garcinia cowa</i> Roxb. ex Choisy                                   | Clusiaceae       | 58.33      |
| <b>5-yr old</b>                                                        |                  |            |
| <b>Species</b>                                                         | <b>Family</b>    | <b>IVI</b> |
| <i>Parkia timoriana</i> (DC.) Merr.                                    | Leguminosae      | 90.67      |
| <i>Castanopsis tribuloides</i> (Sm.) A.DC.                             | Fagaceae         | 71.36      |
| <i>Artocarpus heterophyllus</i> Lam.                                   | Moraceae         | 56.81      |
| <i>Mangifera indica</i> L.                                             | Anacardiaceae    | 49.17      |
| <i>Persea americana</i> Mill.                                          | Lauraceae        | 31.99      |
| <b>15-yr old</b>                                                       |                  |            |
| <b>Species</b>                                                         | <b>Family</b>    | <b>IVI</b> |
| <i>Lithocarpus dealbatus</i> (Hook.f. & Thomson ex Miq.) Rehder        | Fagaceae         | 55.07      |
| <i>Wendlandia budleioides</i> Wall. ex Wight & Arn.                    | Rubiaceae        | 35.81      |
| <i>Castanopsis tribuloides</i> (Sm.) A.DC.                             | Fagaceae         | 31.53      |
| <i>Schima wallichii</i> Choisy                                         | Theaceae         | 31.53      |
| <i>Albizia richardiana</i> (Voigt) King & Prain                        | Leguminosae      | 20.84      |
| <i>Glochidion heyneanum</i> (Wight & Arn.) Wight                       | Phyllanthaceae   | 16.56      |
| <i>Elaeocarpus tectorius</i> (Lour.) Poir.                             | Elaeocarpaceae   | 14.42      |
| <i>Oroxylum indicum</i> (L.) Kurz                                      | Bignoniaceae     | 14.42      |
| <i>Castanopsis lanceifolia</i> (Oerst.) Hickel & A. Camus              | Fagaceae         | 10.26      |
| <i>Callicarpa arborea</i> Roxb.                                        | Lamiaceae        | 10.26      |
| <i>Camellia oleifera</i> Abel                                          | Theaceae         | 10.26      |
| <i>Rhus chinensis</i> Mill.                                            | Anacardiaceae    | 10.26      |
| <i>Toona ciliata</i> M. Roem.                                          | Meliaceae        | 10.26      |
| <i>Albizia chinensis</i> (Osbeck) Merr.                                | Leguminosae      | 7.13       |
| <i>Artocarpus nitidus</i> subsp. <i>griffithii</i> (King) F.M. Jarrett | Moraceae         | 7.13       |
| <i>Eurya acuminata</i> DC.                                             | Pentaphylacaceae | 7.13       |
| <i>Albizia lucidior</i> (Steud.) I.C. Nielsen                          | Leguminosae      | 7.13       |
| <b>40-yr old</b>                                                       |                  |            |
| <b>Species</b>                                                         | <b>Family</b>    | <b>IVI</b> |
| <i>Alseodaphne petiolaris</i> Hook.f.                                  | Lauraceae        | 9.97       |
| <i>Acronychia pedunculata</i> (L.) Miq.                                | Rutaceae         | 8.08       |
| <i>Schima wallichii</i> Choisy                                         | Theaceae         | 7.42       |
| <i>Calophyllum polyanthum</i> Wall. ex Planch. & Triana                | Clusiaceae       | 6.72       |
| <i>Castanopsis tribuloides</i> (Sm.) A.DC.                             | Fagaceae         | 4.76       |
| <i>Archidendron bigeminum</i> (L.) I.C. Nielsen                        | Leguminosae      | 4.13       |
| <i>Elaeocarpus tectorius</i> (Lour.) Poir.                             | Elaeocarpaceae   | 3.26       |
| <i>Castanopsis lanceifolia</i> (Oerst.) Hickel & A. Camus              | Fagaceae         | 3.17       |
| <i>Ficus prostrata</i> (Wall. ex Miq.) Buch.-Ham ex. Miq.              | Moraceae         | 2.80       |
| <i>Diospyros racemosa</i> Roxb.                                        | Ebenaceae        | 2.65       |
| <i>Ilex godajam</i> Colebr. ex Hook.f.                                 | Aquifoliaceae    | 2.42       |
| <i>Maesa montana</i> A.DC.                                             | Primulaceae      | 1.96       |
| <i>Balakata baccata</i> (Roxb.) Esser                                  | Euphorbiaceae    | 1.46       |
| <i>Aporosa octandra</i> (Buch.-Ham. ex D. Don) Vickery                 | Phyllanthaceae   | 1.35       |
| <i>Callicarpa arborea</i> Roxb.                                        | Lamiaceae        | 1.19       |
| <i>Wendlandia budleioides</i> Wall. ex Wight & Arn.                    | Rubiaceae        | 1.12       |
| <i>Toxicodendron succedaneum</i> (L.) Kuntze                           | Anacardiaceae    | 1.05       |

|                                                                 |                  |            |
|-----------------------------------------------------------------|------------------|------------|
| <i>Itea macrophylla</i> Wall.                                   | Iteaceae         | 0.91       |
| <i>Cinnamomum verum</i> J.Presl                                 | Lauraceae        | 0.90       |
| <i>Lithocarpus dealbatus</i> (Hook.f. & Thomson ex Miq.) Rehder | Fagaceae         | 0.90       |
| <i>Croton wallichii</i> Müll.Arg.                               | Euphorbiaceae    | 0.87       |
| <i>Eurya acuminata</i> DC                                       | Pentaphylacaceae | 0.69       |
| <i>Garcinia lanceifolia</i> Roxb.                               | Clusiaceae       | 0.69       |
| <i>Acer laevigatum</i> Wall.                                    | Sapindaceae      | 0.51       |
| <i>Camelia oleifera</i> Abel                                    | Theaceae         | 0.51       |
| <i>Citrus sinensis</i> (L.) Osbeck                              | Rutaceae         | 0.51       |
| <i>Glochidion heyneanum</i> (Wight & Arn.) Wight                | Phyllanthaceae   | 0.51       |
| <i>Lithocarpus pachyphyllus</i> (Kurz) Rehder                   | Fagaceae         | 0.51       |
| <i>Phoebe attenuata</i> (Nees) Nees                             | Lauraceae        | 0.51       |
| <i>Quercus oblongata</i> D.Don                                  | Fagaceae         | 0.51       |
| <i>Syzygium cumini</i> (L.) Skeels                              | Myrtaceae        | 0.51       |
| <b>Natural forest</b>                                           |                  |            |
| <b>Species</b>                                                  | <b>Family</b>    | <b>IVI</b> |
| <i>Acronychia pedunculata</i> (L.) Miq.                         | Rutaceae         | 20.51      |
| <i>Lithocarpus xylocarpus</i> (Kurz) Markgr.                    | Fagaceae         | 17.32      |
| <i>Heteropanax fragrans</i> (Roxb.) Seem.                       | Araliaceae       | 16.29      |
| <i>Eurya acuminata</i> DC                                       | Pentaphylacaceae | 13.17      |
| <i>Cinnamomum verum</i> J.Presl                                 | Lauraceae        | 11.72      |
| <i>Artocarpus heterophyllus</i> Lam.                            | Moraceae         | 11.29      |
| <i>Mangifera sylvatica</i> Roxb.                                | Anacardiaceae    | 11.13      |
| <i>Machilus glaucescens</i> (Nees) H.W.Li                       | Lauraceae        | 10.21      |
| <i>Murraya koenigii</i> (L.) Spreng.                            | Rutaceae         | 10.21      |
| <i>Camelia oleifera</i> Abel                                    | Theaceae         | 9.27       |
| <i>Eurya japonica</i> Thunb.                                    | Pentaphylacaceae | 9.27       |
| <i>Alphonsea lutea</i> (Roxb.) Hook.f. & Thomson                | Annonaceae       | 9.01       |
| <i>Castanopsis tribuloides</i> (Sm.) A.DC.                      | Fagaceae         | 8.70       |
| <i>Glochidion sphaerogynum</i> (Müll.Arg.) Kurz                 | Phyllanthaceae   | 8.20       |
| <i>Bruinsmia polysperma</i> (C.B.Clarke) Steenis                | Styraceae        | 8.07       |
| <i>Albizia richardiana</i> (Voigt) King & Prain                 | Leguminosae      | 7.69       |
| <i>Diospyros lanceifolia</i> Roxb.                              | Ebenaceae        | 6.11       |
| <i>Pterospermum semisagittatum</i> Buch.-Ham. ex Roxb.          | Malvaceae        | 5.89       |
| <i>Albizia lucidior</i> (Steud.) I.C.Nielsen                    | Leguminosae      | 5.55       |
| <i>Eriobotrya bengalensis</i> (Roxb.) Hook.f.                   | Rosaceae         | 5.55       |
| <i>Stereospermum tetragonum</i> DC.                             | Bignoniaceae     | 5.21       |
| <i>Elaeocarpus rugosus</i> Roxb. ex G.Don                       | Elaeocarpaceae   | 5.00       |
| <i>Calophyllum polyanthum</i> Wall. ex Planch. & Triana         | Clusiaceae       | 3.98       |
| <i>Triadica cochinchinensis</i> Lour.                           | Euphorbiaceae    | 3.98       |
| <i>Wendlandia budleioides</i> Wall. ex Wight & Arn.             | Rubiaceae        | 3.98       |
| <i>Croton lissophyllus</i> Radcl.-Sm. & Govaerts ex Esser       | Euphorbiaceae    | 3.86       |
| <i>Embelia tsjeriam-cottam</i> (Roem. & Schult.) A.DC.          | Primulaceae      | 3.86       |
| <i>Aglaia edulis</i> (Roxb.) Wall.                              | Meliaceae        | 3.19       |
| <i>Carallia brachiata</i> (Lour.) Merr.                         | Rhizophoraceae   | 3.19       |
| <i>Helicia excelsa</i> (Roxb.) Blume                            | Proteaceae       | 3.19       |
| <i>Colona floribunda</i> (Kurz) Craib                           | Malvaceae        | 2.96       |
| <i>Dalbergia pinnata</i> (Lour.) Prain                          | Leguminosae      | 2.96       |
| <i>Drimycarpus racemosus</i> (Roxb.) Hook.f. ex Marchand.       | Anacardiaceae    | 2.96       |
| <i>Archidendron bigeminum</i> (L.) I.C.Nielsen                  | Leguminosae      | 1.94       |
| <i>Baccaurea ramiflora</i> Lour.                                | Phyllanthaceae   | 1.94       |
| <i>Balakata baccata</i> (Roxb.) Esser                           | Euphorbiaceae    | 1.94       |
| <i>Bridelia tomentosa</i> Blume                                 | Phyllanthaceae   | 1.94       |
| <i>Engelhardtia roxburghiana</i> Lindl.                         | Juglandaceae     | 1.94       |
| <i>Ficus curtipes</i> Corner                                    | Moraceae         | 1.94       |
| <i>Ficus religiosa</i> L.                                       | Moraceae         | 1.94       |
| <i>Garcinia xanthochymus</i> Hook.f. ex T.Anderson              | Clusiaceae       | 1.94       |
| <i>Homalium ceylanicum</i> (Gardner) Benth.                     | Salicaceae       | 1.94       |
| <i>Laurocerasus undulata</i> (Buch.-Ham. ex D.Don) M.Roem.      | Rosaceae         | 1.94       |

|                                                                   |               |      |
|-------------------------------------------------------------------|---------------|------|
| <i>Litsea salicifolia</i> (J.Roxb. ex Nees) Hook.f.               | Lauraceae     | 1.94 |
| <i>Macaranga indica</i> Wight                                     | Euphorbiaceae | 1.94 |
| <i>Magnolia hodgsonii</i> (Hook.f. & Thomson) H.Keng              | Magnoliaceae  | 1.94 |
| <i>Memecylon celastrinum</i> Kurz                                 | Melastomaceae | 1.94 |
| <i>Olea europaea</i> subsp. <i>cuspidata</i> (Wall. & G.Don) Cif. | Oleaceae      | 1.94 |
| <i>Olea salicifolia</i> Wall. ex G.Don                            | Oleaceae      | 1.94 |
| <i>Oreocnide integrifolia</i> (Gaudich.) Miq.                     | Urticaceae    | 1.94 |
| <i>Ostodes paniculata</i> Blume                                   | Euphorbiaceae | 1.94 |
| <i>Pterospermum lanceifolium</i> Roxb.                            | Malvaceae     | 1.94 |
| <i>Quercus glauca</i> Thunb.                                      | Fagaceae      | 1.94 |
| <i>Syzygium cumini</i> (L.) Skeels                                | Myrtaceae     | 1.94 |
| <i>Toxicodendron succedaneum</i> (L.) Kuntze                      | Anacardiaceae | 1.94 |
| <i>Trema orientalis</i> (L.) Blume                                | Cannabaceae   | 1.94 |
